# Supplementary material
Source: PubMed Central journal article supplement (PMC10808021)

## Supplementary Information Files

**Table S1.** Accession numbers or references of the nuclear and mitochondrial sequences used for the phylogenetic analysis of Balanophoraceae.

**Figure S1.** Maximum Likelihood phylogenetic analysis of Balanophoraceae based on a concatenated alignment of nuclear (rDNA operon) and mitochondrial (*matR*) sequences. Alignments were prepared with MAFFT v7.407 (parameters: -localpair -maxiterate 1000), unaligned blocks were removed with BMGE v1.12 (parameters: -t DNA -m DNAPAM150:2 ), and the phylogenetic analysis was performed with RAxML v.8.2.11 (parameters: -f a -m GTRGAMMA -N 1000). Bootstrap support values >50% are shown above each branch. The scale bar corresponds to substitutions per site.

**Note S1.** List of species and accession numbers of taxa mentioned in Table 1.

### cpDNAs available in public databases:

**Balanophoraceae:** *Balanophora fungosa* MN414176, *B. harlandii* MN414177 (Chen et al. 2019), *B. laxiflora* KX784265, *B. reflexa* KX784266 (Su et al. 2018), *B. yakushimensis* MT901289 (unpublished), *Lophophytum pyramidale* MT834848, *Ombrophytum subterraneum* MT834847 (Ceriotti et al. 2021), *Rhopalocnemis phalloides* MK036331 (Schelkunov et al. 2019), *Sarcophyte sanguinea* OQ810027- OQ810028, *Thonningia sanguinea* OQ810029- OQ810031 (Kim et al. 2023).

**Hydnoraceae:** *Hydnora abissinica* NC065049, *H. africana* NC065136, *H. arabica* NC065211, *H. esculenta* NC065050, *H. longicollis* NC065051, *H. triceps* NC065052 (Jost et al 2022), *H. visseri* NC029358 (Nauman et al. 2016), *Prosopanche bonacinae* NC065053, *P. panguanensis* NC065054 (Jost et al. 2022).

**Cynomoriaceae:** *Cynomorium coccineum* KX270752 (Bellot et al. 2016).

**Rafflesiaceae** lacks a cpDNA (Molina et al. 2014, Cai et al. 2021).

**Cytiniaceae:** *Cytinus hypocistis* NC031150 (Roquet et al. 2016).

**Mitrastemonaceae:** *Mitrastemon kanehirai* MF372930, *M. yamamotoi* MZ317931 (unpublished).

**Apodanthaceae:** *Pilostyles aethiopica* KT981956, *P. hamiltonii* KT981955 (Bellot & Renner 2016).

**Lennoaceae:** *Lennoa madreporoides* NC039720, *Pholisma arenarium* NC039719 (Schneider et al. 2018).

**Cuscuta:** *C. reflexa* NC009766, *C. gronovii* NC009765 (Funk et al 2007), *C. approximata* NC052871, *C. pedicellata* NC052872, *C. africana* NC052870, *C. nitida* NC052869 (Banerjee 2020), *C. carnososa* NC043868, *C. mexicana* NC\_043869, *C. chapalana* NC043870, *C. strobilacea* NC043775, *C. bonafortunae* NC\_043871, *C. costaricense* NC042956, *C. boldinghii* NC042949, *C. erosa* NC042948, *C. pentagona* NC\_039759, *C. obtusiflora* NC\_009949 (Banerjee 2019), *C. japonica* NC060789 (Feng and Lin 2022), *C. exaltata* NC009963 (McNeal 2007), *C. chinensis* MH780079 (Park and Moon 2018), *C. australis* NC045885 (Wang et al. 2020), *C. campestris* BK059222 (Anderson et al. 2021), *C. epithimum* NC\_070194 (unpublished), *C. europaea* NC\_070193 (unpublished), *C. pacifica* OP263625, *C. micrantha* OP356701, *C. nevadensis* OP390286, *C. haughtii* OP402844, *C. volcanica* OP402844, *C. macrocephala* OP414597, *C. chinensis* OPP414596, *C. corymbosa* var. *stylosa* OP414598, *C. polyanthemus* OP441382, *C. indecora* OP414599, *C. vandervenderii* OP414600 (Banerjee & Stefanovic 2023). *Cuscuta* subgenus *Grammica* section *Subulatae* lost or drastically reduced the plastome (Banerjee & Stefanovic 2023).

**Orobanchaceae:** *Aeginetia indica* MW851293; MN529629 (Choi & Park 2021; Chen et al. 2020), *Aphyllon californicum* NC025651 (Wicke et al. 2013), *A. epigalium* MH050785, *A. fasciculatum* NC039679, *A. purpureum* MH499250, *A. uniflorum* MH580290 (Schneider et al. 2018), *Boschniakia himalaica* NC068836 (unpublished), *Boulardia latisquama* NC025641 (Wicke et al. 2013), *Christisonia kwangtungensis* OL362208 (Zhang et al. 2022), *Cistanche deserticola* NC\_021111 (Li et al. 2013), *C. phelypaea* NC\_025642 (Wicke et al. 2013), *C. salsa* MN614128 (Liu et al. 2020), *C. sinensis* MK386641; MN614129 (Liu et al. 2020), *C. tubulosa* MK386642.1 (Liu et al. 2020), *Conopholis americana* NC023131 (Wicke et al. 2013), *Diphelypaea coccinea* NC043877 (Gruzdev et al. 2019), *Epifagus virginiana* NC001568 (Wolfe et al. 1992), *Lathraea squamaria* NC027838 (Samigullin et al. 2016), *Orobanche austrohispanica* NC031441, *O. densiflora* NC031442, *O. pancicii* NC031443, *O. rapum-genistae* NC\_031444 (Cusimano & Wicke, 2016), *O. cernua* KT387722 (Wicke et al. 2013), *O. coerulescens* NC068242 (unpublished), *O. crenata* NC024845, *O. gracilis* NC023464 (Wicke et al. 2013),

*Phacellanthus tubiflorus* NC068243 (unpublished), *Phelipanche purpurea* NC023132, *P. ramosa* NC023465 (Wicke et al. 2013), *P. aegyptiaca* KU212370 (Wicke et al. 2016).

**Complete and draft mitochondrial genome assemblies available in public databases:**

**Balanophoraceae:** Complete mtDNAs of *Lophophytum mirabile* KU992322-KU992380, KX792461 (Sanchez-Puerta et al. 2017), *Ombrophytum subterraneum* MT076267-MT076320 (Roulet et al. 2020), *Rhopalocnemis phalloides* MZ269392–MZ269412 (Yu et al. 2022).

**Hydnoraceae:** Draft mtDNAs of *Hydnora visseri* OP649464.1- OP649479.1 and *Prosopanche americana*: OP649480.1 - OP649522.1 (Yu et al. 2023).

**Cynomoriaceae:** Complete mtDNAs of *Cynomorium coccineum* KX270753.1-KX270801.1 (Bellot et al. 2016).

**Rafflesiaceae:** Draft mtDNAs of *Sapria himalayana* SRR629601, SRR629606, *Rafflesia cantleyi* SRR629613, and *Rafflesia tuan-mudae* SRR629600 (Xi et al. 2013; assembled contigs not available), *Rafflesia lagascae* SRR1120517, SRR1121763 (Molina et al. 2014; assembled contigs not available), *Rafflesia leonardi* KJ154961-KJ155011 (Nickrent et al. unpublished).

**Cuscuta:** Complete mtDNAs of *C. australis* (8 contigs) BK059197-BK059204, *C. campestris* BK016277 (Anderson et al. 2021), *C. epilinum* BK059237, *C. europea* BK059238, *C. japonica* NC\_060804 (Lin et al. 2022).

**Orobanchaceae:**

Complete mtDNAs of *Aeginetia indica* NC\_069194; MW851294; MW582538 (Zhong et al. 2022; Choi & Park, 2021), *Boschniakia himalaica* OP019634-OP019648, *B. rossica* OP019631-OP019633 (Zhang et al. 2023), *Christisonia kwangtungensis* OM219025-OM219027 (Zhang et al. 2022), *Cistanche* spp. ON890398 - ON890419 (Miao et al. 2022).

Draft mtDNAs of *Aphyllon epigalium* MG987142, MH129026 (Schneider et al. 2018) and *Orobanche* spp. KT366929 - KT366933, KT366957-KT366958 KT366955; KT367291-KT367292; KT367470, KT367476, KT367509-KT367510, KT367489 (Fan et al. 2016).

**Table S1.** Accession numbers or references of the nuclear and mitochondrial sequences used for the phylogenetic analysis of Balanophoraceae.

| <b>Species</b>                      | <b>18S</b>                    | <b>26S</b>                    | <b>ITS1 - 5.8S - ITS2</b> | <b>matR</b> |
|-------------------------------------|-------------------------------|-------------------------------|---------------------------|-------------|
| <i>Balanophora fungosa</i>          | JN392868                      | KP263238                      | JN392881                  | JQ613244    |
| <i>Balanophora laxiflora</i>        | JN392870                      | KP263239                      | JN392888                  | JQ613245    |
| <i>Corynaea crassa</i>              | L24400                        | KP263242                      | OM471919                  | KP263265    |
| <i>Helosis cayennensis</i>          | L25682                        | -                             | KT709670                  | KP263268    |
| <i>Langsdorffia hypogaea</i>        | L25683                        | -                             | KT709672                  | MG234111    |
| <i>Lophophytum mirabile</i>         | Ceriotti <i>et al.</i> 2021 - | Ceriotti <i>et al.</i> 2021 - | SRX1630042                | KU992322    |
| <i>Lophophytum pyramidale</i>       | KP263283                      | KP263249                      | KT709674                  | KP263270    |
| <i>Ombrophytum subterraneum</i>     | L24406                        | KP263254                      | -                         | EU281127    |
| <i>Rhopalocnemis phalloides</i>     | Ceriotti <i>et al.</i> 2021 - | Ceriotti <i>et al.</i> 2021 - | SRX4826442                | -           |
| <i>Sarcophyte sanguinea</i>         | KP263286                      | -                             | -                         | KP263277    |
| <i>Scybalium jamaicense</i>         | U59933                        | -                             | -                         | -           |
| <i>Thonningia sanguinea</i>         | KP263289                      | -                             | KT763386                  | KP263280    |
| <i>Spinacia oleracea</i> (outgroup) | L24420                        | HQ843464                      | -                         | NC_035618   |

Note: the available sequence of the rDNA operon of *Lathrophytum* is too short for meaningful phylogenetic analysis.

**Figure S1.** Maximum Likelihood phylogenetic analysis of Balanophoraceae based on a concatenated alignment of nuclear (rDNA operon) and mitochondrial (*matR*) sequences. Alignments were prepared with MAFFT v7.407 (parameters: -localpair -maxiterate 1000), unaligned blocks were removed with BMGE v1.12 (parameters: -t DNA -m DNAPAM150:2 ), and the phylogenetic analysis was performed with RAxML v.8.2.11 (parameters: -f a -m GTRGAMMA -N 1000). Bootstrap support values >50% are shown above each branch. The scale bar corresponds to substitutions per site.

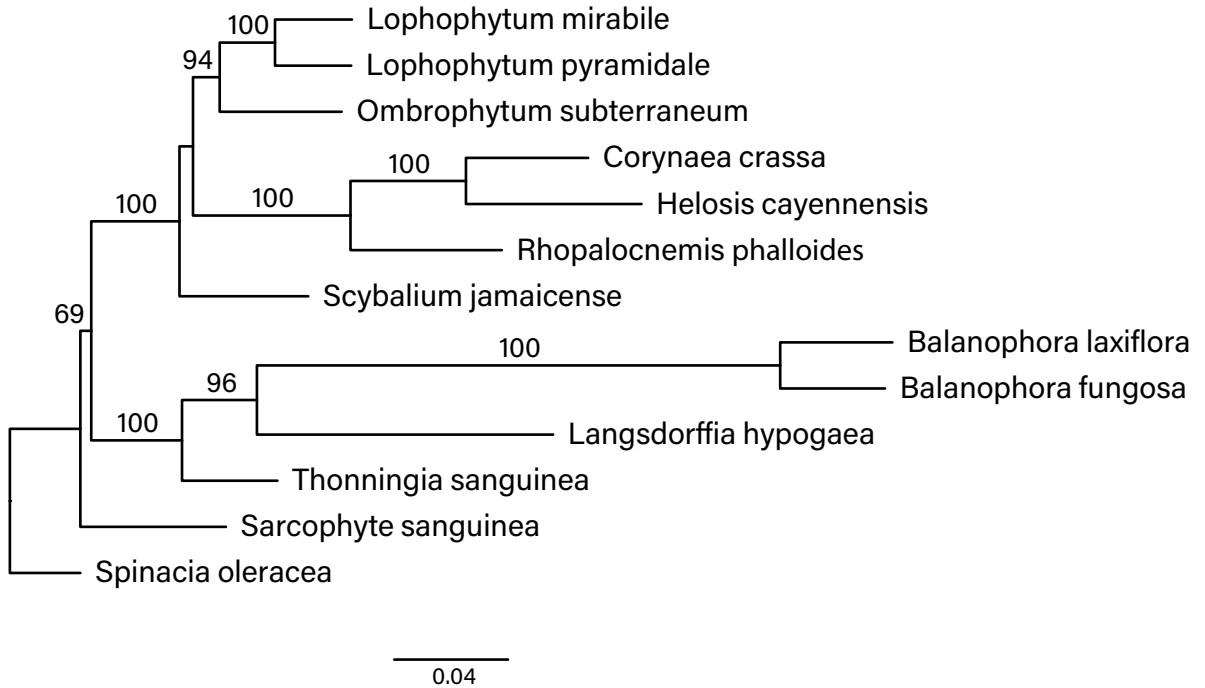

Supplement: mcad108_suppl_supplementary_files.pdf [file mcad108_suppl_supplementary_files.pdf]
